# Supplementary material for: Energetics of Transport through the Nuclear Pore Complex
Source: PLOS journal article supplement (doi:10.1371/journal.pone.0148876), 2016-02-19
Supplement: S2 (10.1371/journal.pone.0148876.s002) [file journal.pone.0148876.s002]

### Parametrization of the transport model:

The first term in Eq. (1) is a quadratic function  $f(D') = 356.4D'^2$  which is obtained by fitting the data points in Fig. 3. The second term is a quadratic function  $g(X) = 150X^2 + 44X + 0.22$  which is obtained by fitting data points of Fig. 7 (see inset) corresponding to a cargo with  $D = 10$  nm.

S3 Fig shows a comparison between the transport model of Eq. (1) (solid lines) and the data points from the umbrella sampling simulations (filled circles). The blue data points corresponding to  $D = 10$  nm have been used for fitting. The black data points correspond to  $D = 7.3$  nm, showing excellent agreement with the predictions (green solid lines) of the transport model.
